# Supplementary material for: Aberrant information transfer interferes with functional axon regeneration
Source: eLife journal article supplement (doi:10.7554/elife.38829), 2018-10-29
Supplement: supp [file elife-38829-supp-v1.zip]

Archive with 11 entries (11 files):
- elife_poa_e38829_Transparent_Reporting_File.pdf
- elife_poa_e38829_Figure_2_figure_supplement_2.pdf
- elife_poa_e38829_Figure_4_figure_supplement_1.pdf
- elife_poa_e38829_Figure_2_figure_supplement_1.pdf
- elife_poa_e38829_Figure_7_figure_supplement_1.pdf
- elife_poa_e38829_Figure_1_figure_supplement_1.pdf
- elife_poa_e38829_Figure_6_figure_supplement_1.pdf
- elife_poa_e38829_Figure_4_figure_supplement_2.pdf
- elife_poa_e38829_Figure_3_figure_supplement_1.pdf
- elife_poa_e38829_Figure_5_figure_supplement_1.pdf
- elife_poa_e38829_Figure_8_figure_supplement_1.pdf
