# Supplementary material for: Aberrant information transfer interferes with functional axon regeneration
Source: eLife journal article supplement (doi:10.7554/elife.38829), 2018-10-29
Supplement: supp [file elife-38829-supp-v1.zip › elife_poa_e38829_Figure_2_figure_supplement_1.pdf]

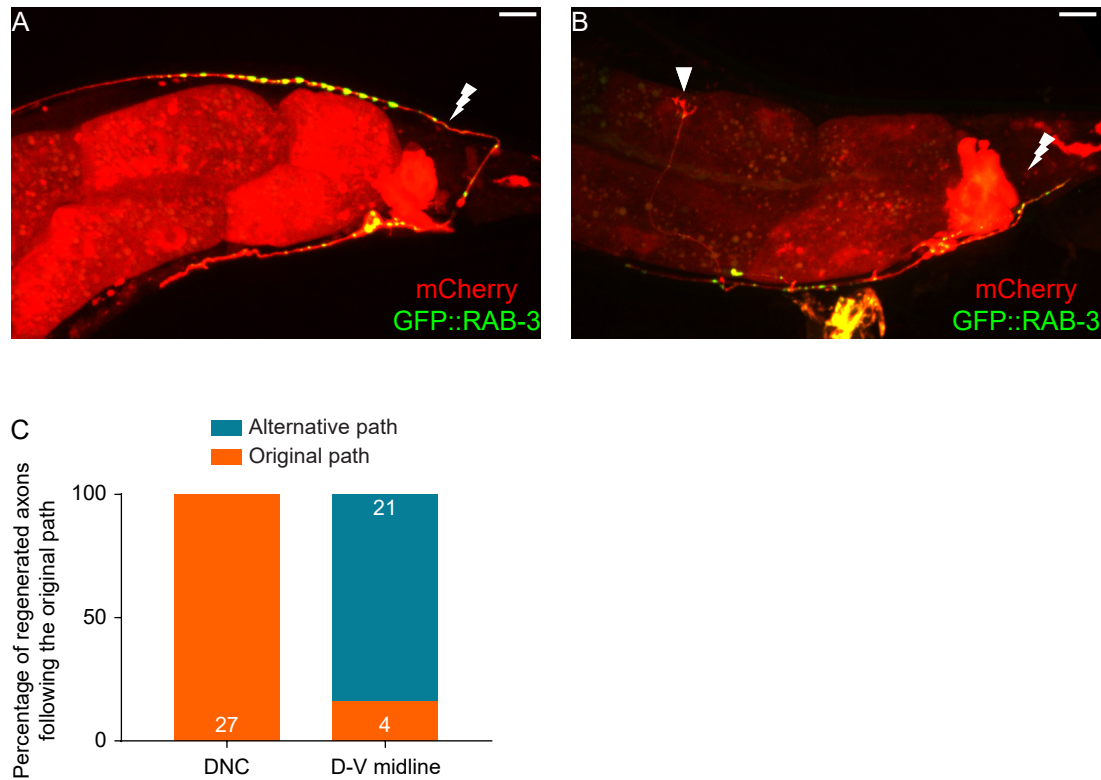

**Figure 2 supplement 1. Axotomy in the DNC enables accurate axon growth following the original path**

(A) DA9 regeneration 48hr after axotomy in the DNC. The lightning mark indicates the cutting site. The scale bar = 10  $\mu$ m.

(B) DA9 regeneration 48hr after axotomy in the dorsal-ventral midline of the commissure. The lightning mark indicates the cutting site. The arrowhead indicates the growth cone. The scale bar = 10  $\mu$ m.

(C) Quantification of regenerated DA9 axons following the original axon path or an alternative path. The number indicates number of animals.
