# Supplementary material for: Aberrant information transfer interferes with functional axon regeneration
Source: eLife journal article supplement (doi:10.7554/elife.38829), 2018-10-29
Supplement: supp [file elife-38829-supp-v1.zip › elife_poa_e38829_Figure_2_figure_supplement_2.pdf]

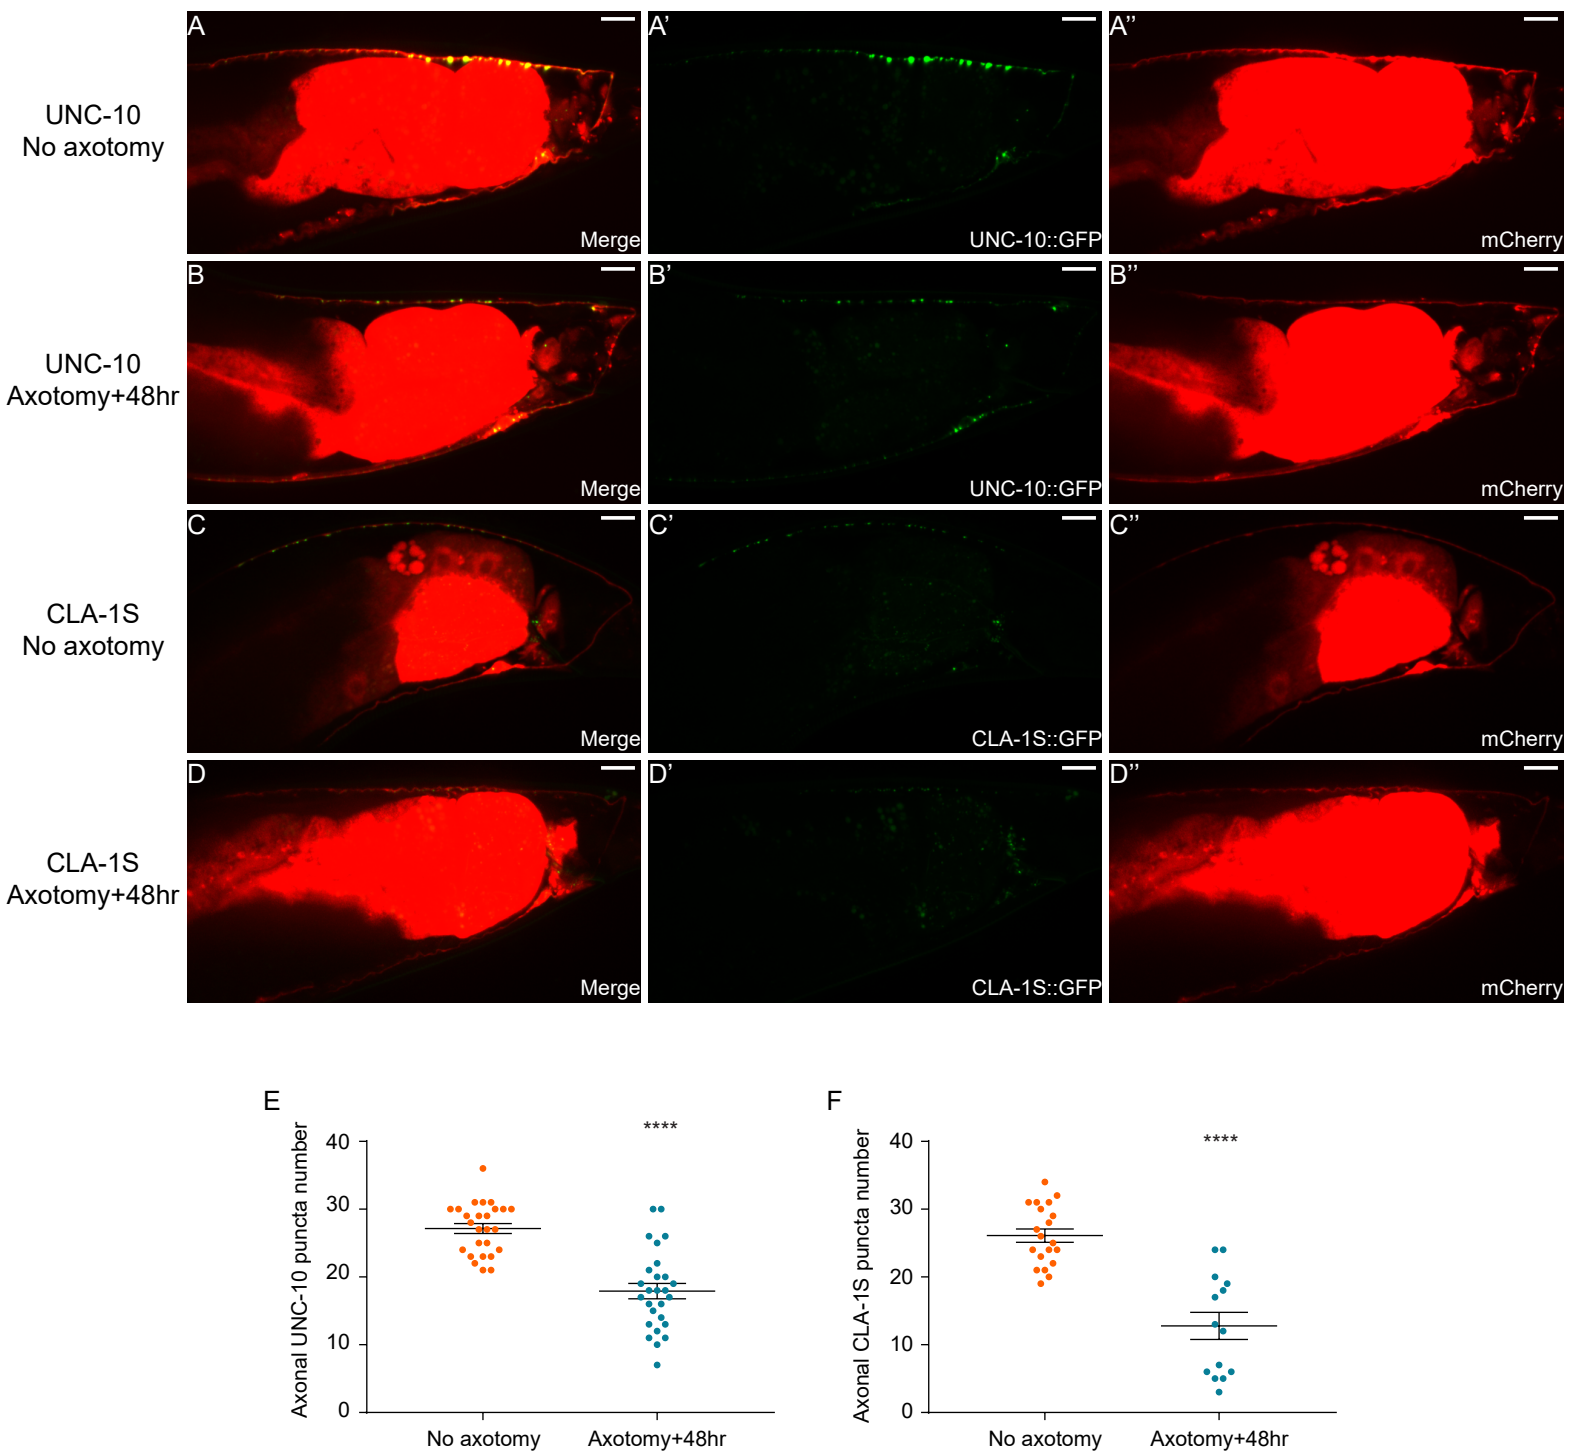

### Figure 2 supplement 2. Regeneration of other presynaptic components

(A-A'') UNC-10 localization in intact DA9. Scale bars = 10  $\mu$ m.

(B-B'') UNC-10 localization in regenerated DA9. Scale bars = 10  $\mu$ m.

(C-C'') CLA-1S localization in intact DA9. Scale bars = 10  $\mu$ m.

(D-D'') CLA-1S localization in regeneration DA9. Scale bars = 10  $\mu$ m.

(E) Quantification of axonal UNC-10 puncta number. \*\*\*\*,  $p < 0.0001$ . Unpaired t test.

(F) Quantification of axonal CLA-1S puncta number. \*\*\*\*,  $p < 0.0001$ . Unpaired t test.
