# Supplementary material for: Aberrant information transfer interferes with functional axon regeneration
Source: eLife journal article supplement (doi:10.7554/elife.38829), 2018-10-29
Supplement: supp [file elife-38829-supp-v1.zip › elife_poa_e38829_Figure_3_figure_supplement_1.pdf]

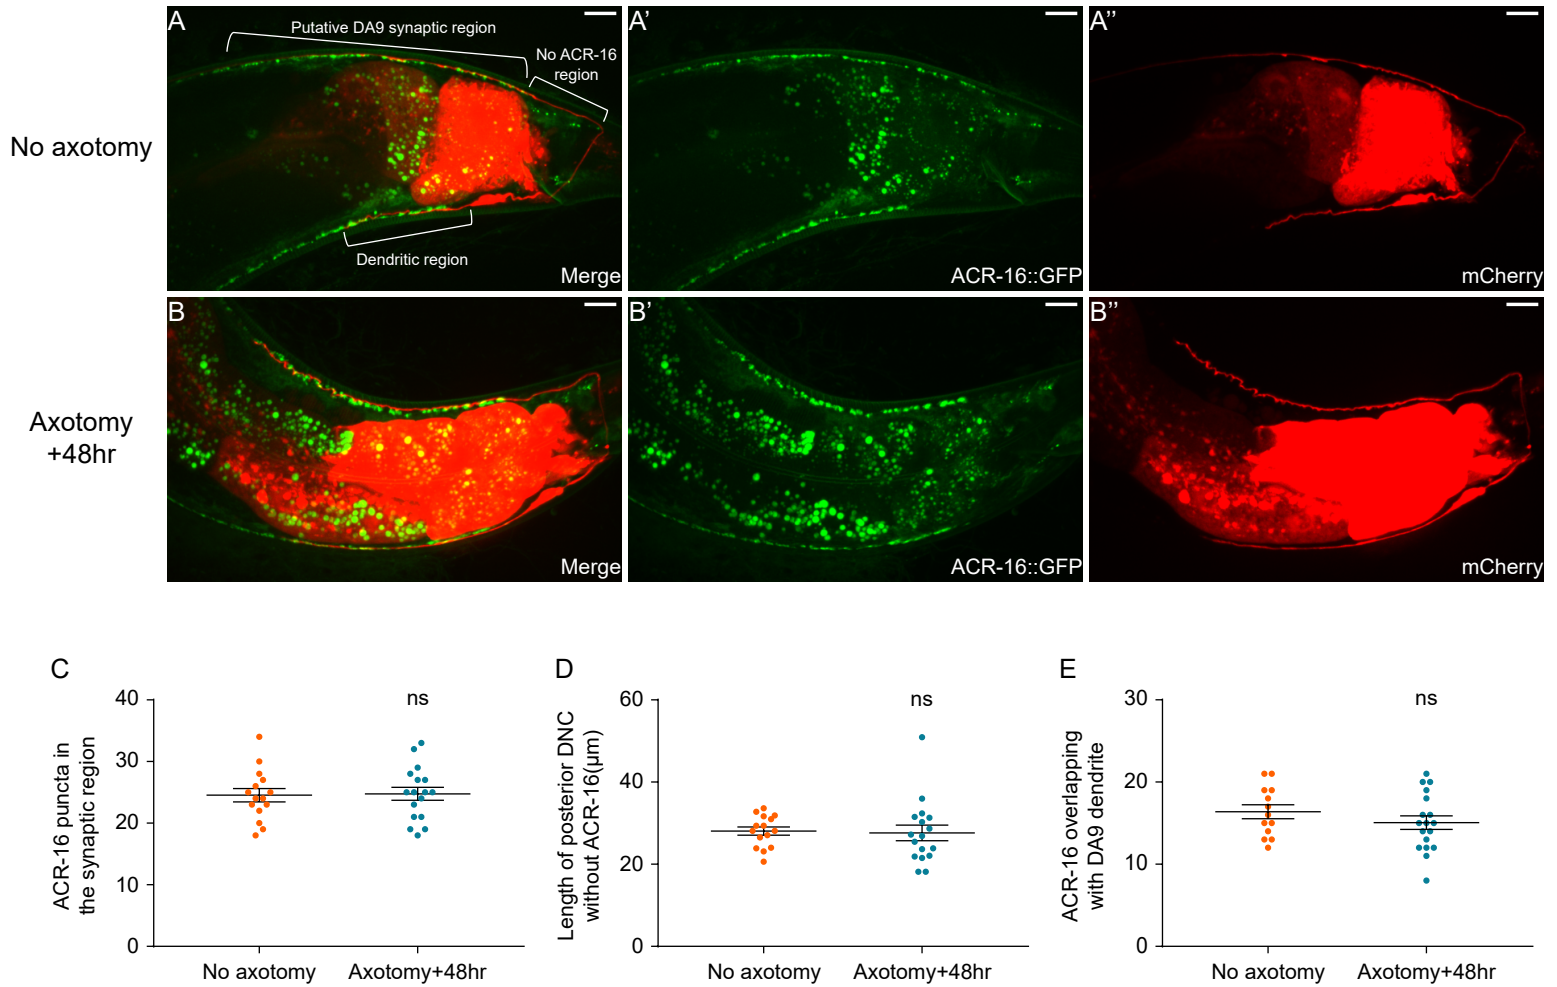

### Figure 3 supplement 1. No change of postsynaptic receptors in body wall muscles after axotomy

(A-A'') Muscle ACR-16 localization in intact animals. Note its localization in both the dorsal and ventral nerve cords. Scale bars = 10  $\mu$ m.

(B-B'') Muscle ACR-16 maintains its localization 48hr after DA9 axotomy. Scale bars = 10  $\mu$ m.

(C) ACR-16::GFP puncta number in the putative DA9 synaptic region (~85 $\mu$ m anterior from the most posterior ACR-16 puncta in the dorsal nerve cord) in both intact and axotomized animals. ns, not significant. Unpaired t test.

(D) Length of posterior DA9 axon without ACR-16 in both intact and axotomized animals. ns, not significant. Unpaired t test.

(E) Number of ACR-16::GFP puncta overlapping with DA9 dendrite in both intact and axotomized animals. ns, not significant. Unpaired t test.
