# Supplementary material for: Aberrant information transfer interferes with functional axon regeneration
Source: eLife journal article supplement (doi:10.7554/elife.38829), 2018-10-29
Supplement: supp [file elife-38829-supp-v1.zip › elife_poa_e38829_Figure_4_figure_supplement_1.pdf]

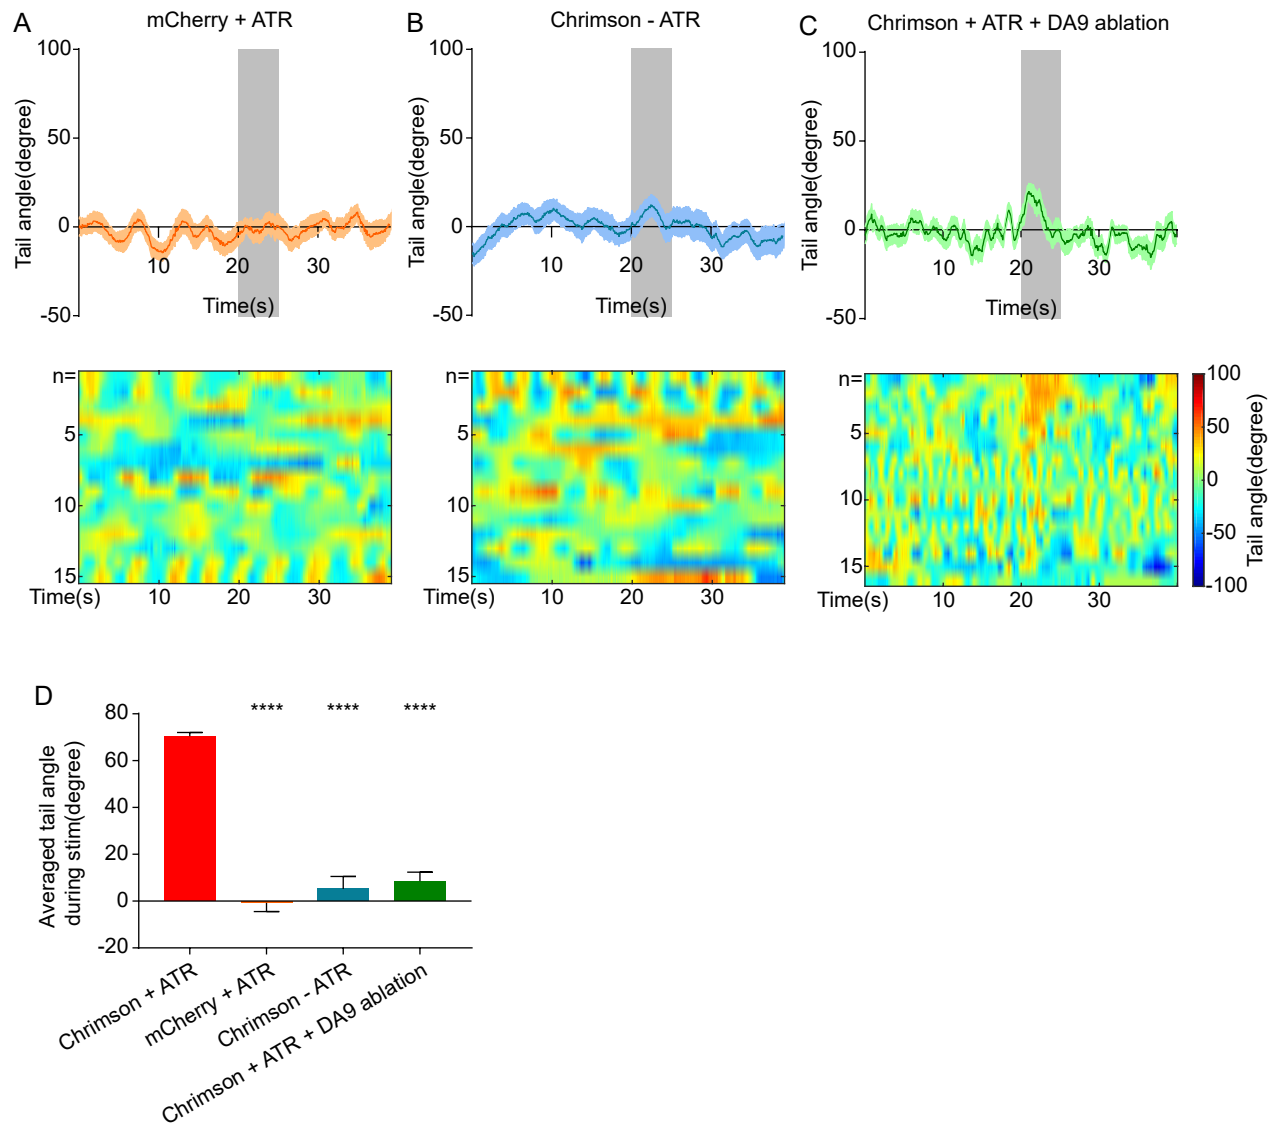

**Figure 4 supplement 1. Optogenetically-triggered tail-bending behavior requires Chromson and ATR and is DA9 specific**

(A) *ric-7(n2657)* animals expressing mCherry instead of Chromson supplied with ATR show no dorsal tail bending. Mean  $\pm$  SEM. The shaded area represents the 5 seconds stimulation.

(B) *ric-7(n2657)* animals expressing Chromson in the absence of ATR show no dorsal tail bending. Mean  $\pm$  SEM. The shaded area represents the 5 seconds stimulation.

(C) WT animals expressing Chromson supplied with ATR but with their DA9 cell body ablated show no dorsal tail bending. Mean  $\pm$  SEM. The shaded area represents the 5 seconds stimulation.

(D) Averaged tail angle during stimulation of positive controls and animals in (A), (B) and (C). The positive controls are the same as in Figure 4C. Mean and SEM. \*\*\*\* $p < 0.0001$ . Unpaired t test.
