# Supplementary material for: Aberrant information transfer interferes with functional axon regeneration
Source: eLife journal article supplement (doi:10.7554/elife.38829), 2018-10-29
Supplement: supp [file elife-38829-supp-v1.zip › elife_poa_e38829_Figure_4_figure_supplement_2.pdf]

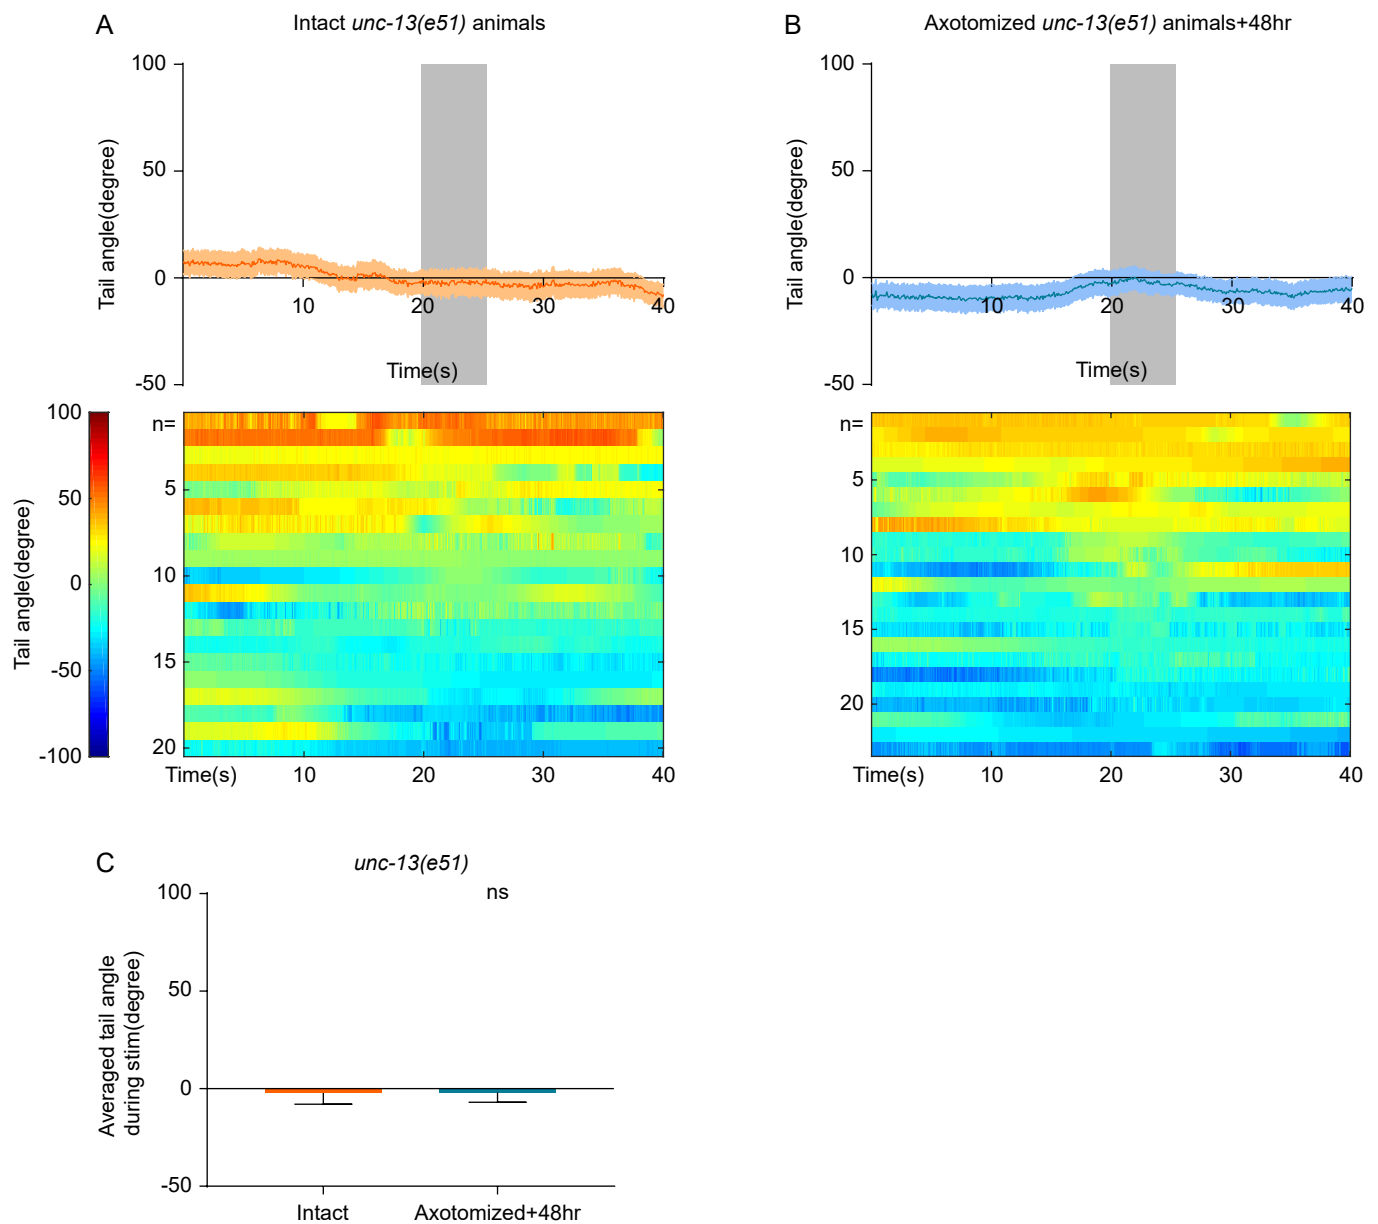

**Figure 4 supplement 2. Optogenetically-triggered tail-bending behavior depends on synaptic transmission**  
 (A) Tail-bending behavior of intact *unc-13(e51)* animals (2d old adults).  
 (B) Tail-bending behavior of *unc-13(e51)* animals 48hr after axotomy.  
 (C) Averaged tail angle during stimulation of both intact and axotomized *unc-13(e51)* animals in (A) and (B). ns, not significant. Unpaired t test.
