# Supplementary material for: Aberrant information transfer interferes with functional axon regeneration
Source: eLife journal article supplement (doi:10.7554/elife.38829), 2018-10-29
Supplement: supp [file elife-38829-supp-v1.zip › elife_poa_e38829_Figure_5_figure_supplement_1.pdf]

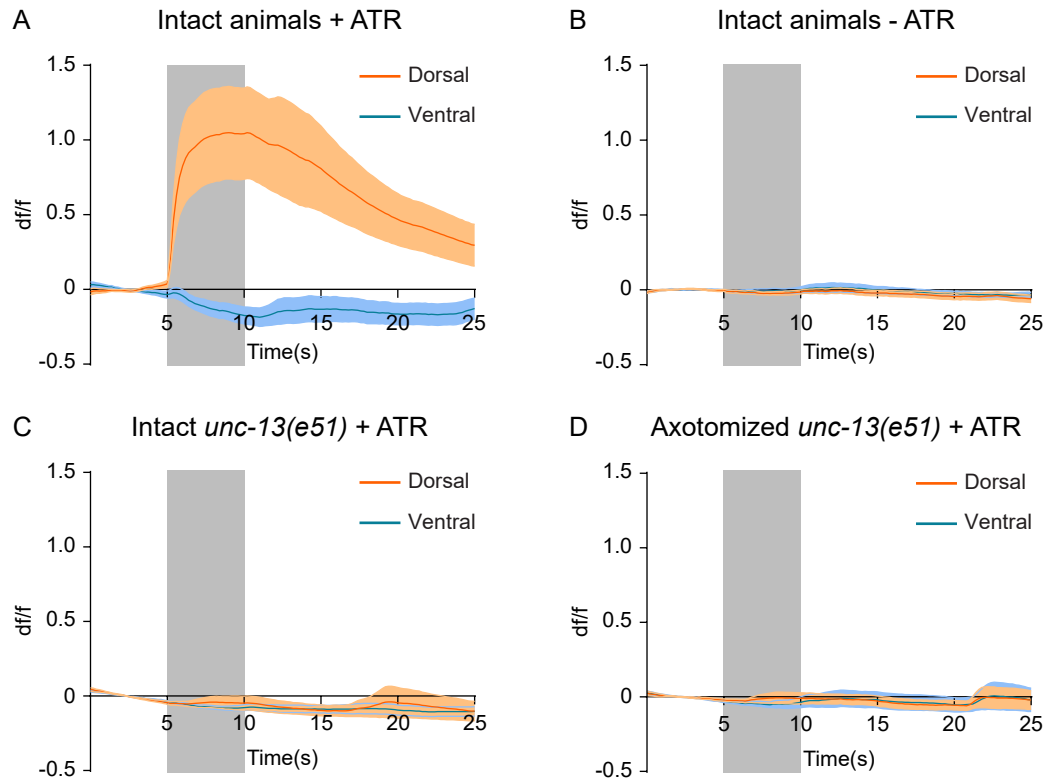

**Figure 5 supplement 1. Optogenetically-induced muscle calcium response requires all-trans retinal and depends on synaptic transmission**

(A) Calcium responses in intact adult animals cultured with all-trans retinal (ATR) (n=17).

(B) No calcium responses in intact adult animals cultured without ATR (n=24).

(C) No calcium responses in intact *unc-13(e51)* animals with ATR (n=25).

(D) No calcium responses in *unc-13(e51)* animals 48hr after axotomy with ATR (n=24).
