# Supplementary material for: Aberrant information transfer interferes with functional axon regeneration
Source: eLife journal article supplement (doi:10.7554/elife.38829), 2018-10-29
Supplement: supp [file elife-38829-supp-v1.zip › elife_poa_e38829_Figure_6_figure_supplement_1.pdf]

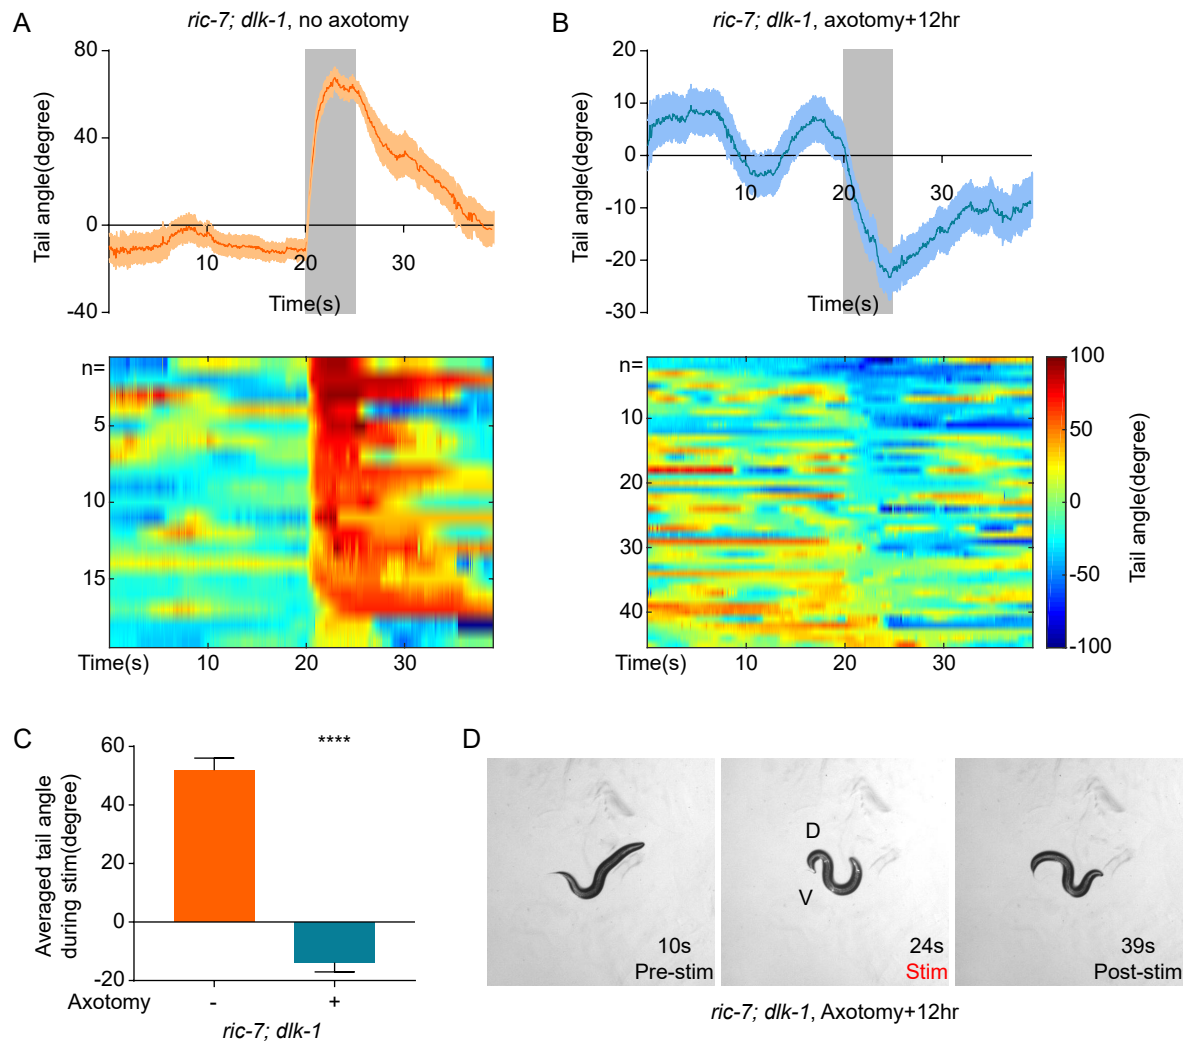

**Figure 6 supplement 1. Behavior response of *ric-7(n2657); dlk-1(ju476)* animals with and without axotomy**  
 (A) *ric-7(n2657); dlk-1(ju476)* intact animals show robust dorsal tail bending. The shaded area represents the 5 seconds stimulation. Mean  $\pm$  SEM.  
 (B) *ric-7(n2657); dlk-1(ju476)* axotomized animals show robust ventral tail bending 12hr after axotomy. Mean  $\pm$  SEM.  
 (C) Averaged tail angle during stimulation of animals in (A) and (B). Mean and SEM. \*\*\*\* $p < 0.0001$ . Unpaired t test.  
 (D) Images from a movie showing the ventral-bending behavior of a *ric-7(n2657); dlk-1(ju476)* animal 12hr after axotomy.
