# Supplementary material for: Aberrant information transfer interferes with functional axon regeneration
Source: eLife journal article supplement (doi:10.7554/elife.38829), 2018-10-29
Supplement: supp [file elife-38829-supp-v1.zip › elife_poa_e38829_Figure_7_figure_supplement_1.pdf]

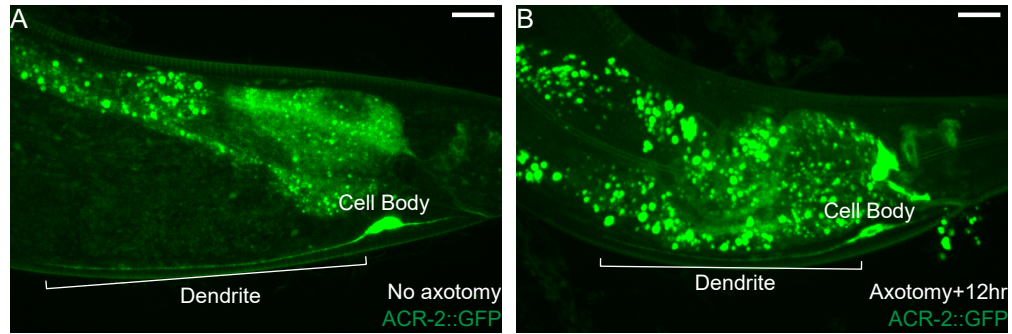

**Figure 7 supplement 1. ACR-2, a subunit of the nicotinic acetylcholine receptor, maintains dendritic localization after axotomy.**

(A) ACR-2::GFP localizes to the dendrite and soma of DA9 in intact *ric-7(n2657)* animals. The scale bar = 10  $\mu$ m.

(B) ACR-2::GFP still localizes to the dendrite and soma of DA9 in axotomized *ric-7(n2657)* animals 12hr after axotomy. The scale bar = 10  $\mu$ m.
