# Supplementary material for: Aberrant information transfer interferes with functional axon regeneration
Source: eLife journal article supplement (doi:10.7554/elife.38829), 2018-10-29
Supplement: supp [file elife-38829-supp-v1.zip › elife_poa_e38829_Figure_8_figure_supplement_1.pdf]

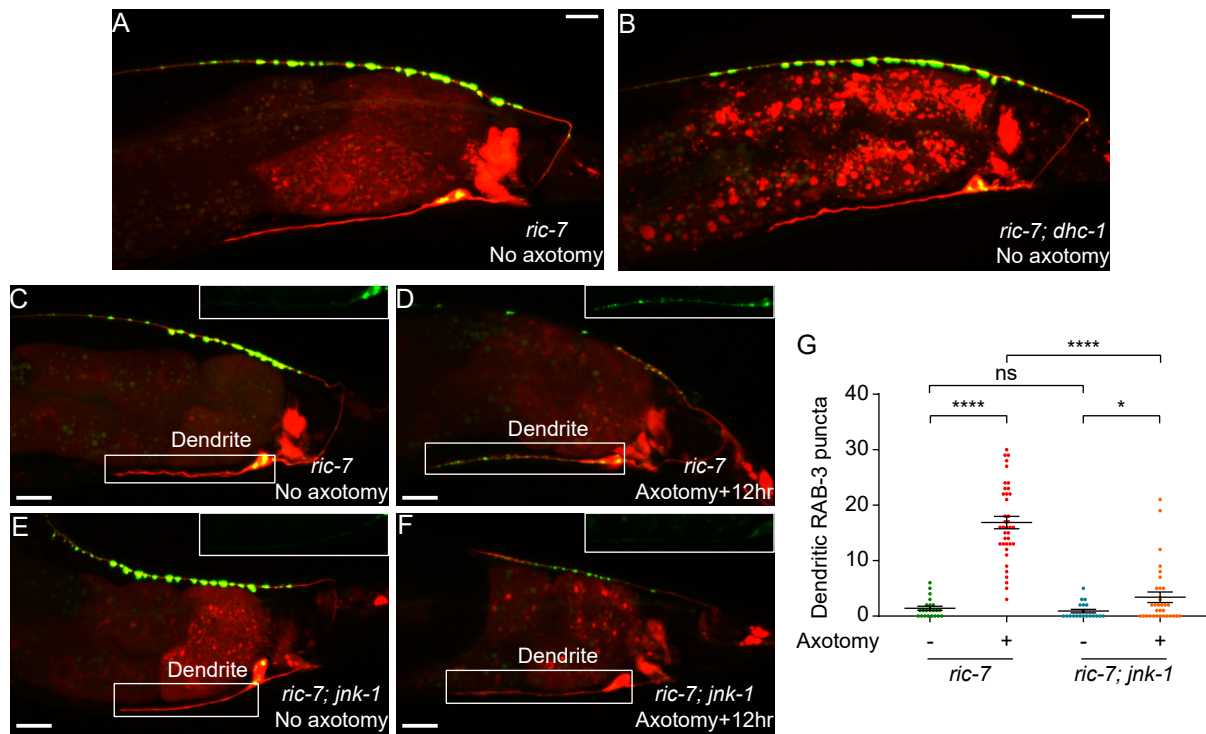

**Figure 8 supplement 1. DA9 in *dhc-1(js319)* animals develops normally and loss of JNK-1 rescues RAB-3 mis-localization in DA9 dendrite 12 hr after axotomy**

(A-B) RAB-3::GFP and mCherry labeling of DA9 in intact *ric-7(n2657)* and *ric-7(n2657); dhc-1(js319)* animals (2d old adults). Scale bars = 10  $\mu$ m.

(C-F) RAB-3 localization to the dendrite in *ric-7(n2657)* and *ric-7(n2657); jnk-1(gk7)* animals with and without axotomy 12hr after axotomy. Magnified GFP channels are shown at the top right corner. Scale bars = 10  $\mu$ m.

(G) Quantification of dendritic RAB-3 puncta number in animals in (C-F). Mean  $\pm$  SEM. \*p<0.05; \*\*\*\*p<0.0001; ns, not significant. Unpaired t test.
